# Supplementary material
Source: PubMed Central journal article supplement (PMC2736433)
Supplement: 0906348106_0906348106SI.pdf [file 0906348106_0906348106SI.pdf]

# Supporting Information

Hesselson et al. 10.1073/pnas.0906348106

## SI Text

**Zebrafish Strains and Lines.** Zebrafish were raised under standard laboratory conditions at 28 °C. Heat-shocks were performed at 39.5 °C. We used the following lines: *Tg(XIEef1a1:GFP)<sup>s854</sup>* (1), *Tg(-4.0ins:GFP)<sup>zfs5</sup>* (2), *Tg(ins:dsRed)<sup>m1018</sup>* (3), *Tg(Ptf1a:eGFP)<sup>ih1</sup>* (4), *Tg(ins:Cre; cryaa:Venus)<sup>s924</sup>*, *Tg(hsp70l:loxP-mCherry-STOP-loxP-H2B-GFP; cryaa:Cerulean)<sup>s923</sup>* (defined here as “Insulin-HOTcre”), *Tg(ins:CFP-NTR)<sup>s892</sup>* (5), and *prkci<sup>m567</sup>* (6).

**DNA Constructs and Transgenic Lines.** *ins-Cre; cryaa:Venus* was generated by placing the *Cre* coding sequence downstream of 1.5 kb of the proximal insulin promoter. The *cryaa:Venus* cassette was inserted downstream of *Cre* in the reverse orientation using 0.54 kb of the *cryaa* promoter (7). *hsp70l:loxP-mCherry-STOP-loxP-H2B-GFP; cryaa:Cerulean* was constructed using 1.5 kb of the *hsp70l* promoter (8). The floxed *mCherry-STOP* and *H2B-GFP* fragments were PCR amplified individually and sequentially cloned downstream of the *hsp70l* promoter. The *mCherry-STOP* cassette serves as a heat-shock induction marker prevents read-through translation of the H2B-GFP fusion protein, which is only expressed in cells that have undergone a Cre mediated excision event. *cryaa:Cerulean* was inserted downstream of *H2B-GFP* in the reverse orientation. Both constructs were generated in a pBluescript backbone that contains I-SceI meganuclease sites. Multiple transgenic lines were established for each construct using the I-SceI meganuclease method as described in ref. 9. A single representative transgenic line for each construct was used for all experiments.

**Immunofluorescence.** Antibody staining was performed as described in ref. 10 using the following antibodies: Islet-1 (1:100, Developmental Studies Hybridoma Bank clone 39.4D5), insulin (1:100, Biomed V2024), somatostatin (1:100, Serotec 8330-0154), glucagon (1:200, Sigma G2654), GFP (1:500, Aves Labs GFP-1020 or 1:500, Stratagene 632380), and Alexa secondary

antibodies (1:500, Invitrogen). Cell nuclei were visualized with the DRAQ5 DNA stain (1:1000, Biostatus Limited DR50050) or TOPRO3 (1:2000, Invitrogen T3605).

**Morpholino Injections.** We injected 8 ng of a previously described morpholino targeted against the translational start site of *prkci* (11).

**Proliferation Analysis.** For EdU incorporation and detection, we used the Click-IT 647 kit (Invitrogen C10085) according to manufacturer's instructions, with adaptations for whole mount samples. Briefly, tricaine-anesthetized larvae were injected into the yolk or transpericardially with approximately 5 nL EdU solution (1 μM/2% DMSO/0.1% phenol red), then recovered at 28 °C. Samples were fixed overnight in 3% formaldehyde in PBS and de-yolked. Samples were then treated with PBS + 0.3% Triton X-100 for 20 min, rinsed once with ddH<sub>2</sub>O, and then reacted with 250 μL fresh labeling solution for 20 min.

**FACS Analysis.** Two hundred larvae at 12 dpf were enriched for islets by removing the head and tail with a scalpel. For FACS analysis at 24 hpf the yolk, head, and tail were removed from 200 embryos with fine gauge needles. The samples were dissociated in 1 mL 5% FBS/HBSS with Liberase 3 (Roche) at 37 °C for 1 h. The cells were filtered three times with a 40-μM nylon strainer and sorted using the FACSDiva platform (BD Biosciences).

**Real-Time RT-PCR.** RNA was isolated from 0.5–2 × 10<sup>4</sup> cells using TRIzol (Invitrogen 15596). cDNA was prepared using the SuperScript III kit (Invitrogen). Optimized primers targeting each gene and β-actin were designed using the Plexor Primer Design System (Promega, Table S2). cDNA was amplified with Power SYBR Green master mix (Applied Biosystems). The 7900HT Real-Time PCR System (Applied Biosystems) was used to obtain Ct values. The relative expression of each sample was determined after normalization to β-actin using the relative standard curve method (12).

1. Field HA, Ober EA, Roeser T, Stainier DY (2003) Formation of the digestive system in zebrafish. I. Liver morphogenesis. *Dev Biol* 253:279–290.
2. Huang H, Vogel SS, Liu N, Melton DA, Lin S (2001) Analysis of pancreatic development in living transgenic zebrafish embryos. *Mol Cell Endocrinol* 177:117–124.
3. Shin CH, et al. (2008) Multiple roles for Med12 in vertebrate endoderm development. *Dev Biol* 317:467–479.
4. Godinho L, et al. (2005) Targeting of amacrine cell neurites to appropriate synaptic laminae in the developing zebrafish retina. *Development* 132:5069–5079.
5. Curado S, et al. (2007) Conditional targeted cell ablation in zebrafish: A new tool for regeneration studies. *Dev Dyn* 236:1025–1035.
6. Field HA, Dong PD, Beis D, Stainier DY (2003) Formation of the digestive system in zebrafish. II. Pancreas morphogenesis. *Dev Biol* 261:197–208.
7. Kurita R, et al. (2003) Suppression of lens growth by alphaA-crystallin promoter-driven expression of diphtheria toxin results in disruption of retinal cell organization in zebrafish. *Dev Biol* 255:113–127.
8. Halloran MC, et al. (2000) Laser-induced gene expression in specific cells of transgenic zebrafish. *Development* 127:1953–1960.
9. Thernes V, et al. (2002) I-SceI meganuclease mediates highly efficient transgenesis in fish. *Mech Dev* 118:91–98, 2002.
10. Dong PD, et al. (2007) Fgf10 regulates hepatopancreatic ductal system patterning and differentiation. *Nat Genet* 39:397–402.
11. Peterson RT, Mably JD, Chen JN, Fishman MC (2001) Convergence of distinct pathways to heart patterning revealed by the small molecule concentramide and the mutation heart-and-soul. *Curr Biol* 11:1481–1491.
12. Larionov A, Krause A, Miller W (2005) A standard curve based method for relative real time PCR data processing. *BMC Bioinformatics* 6:62.

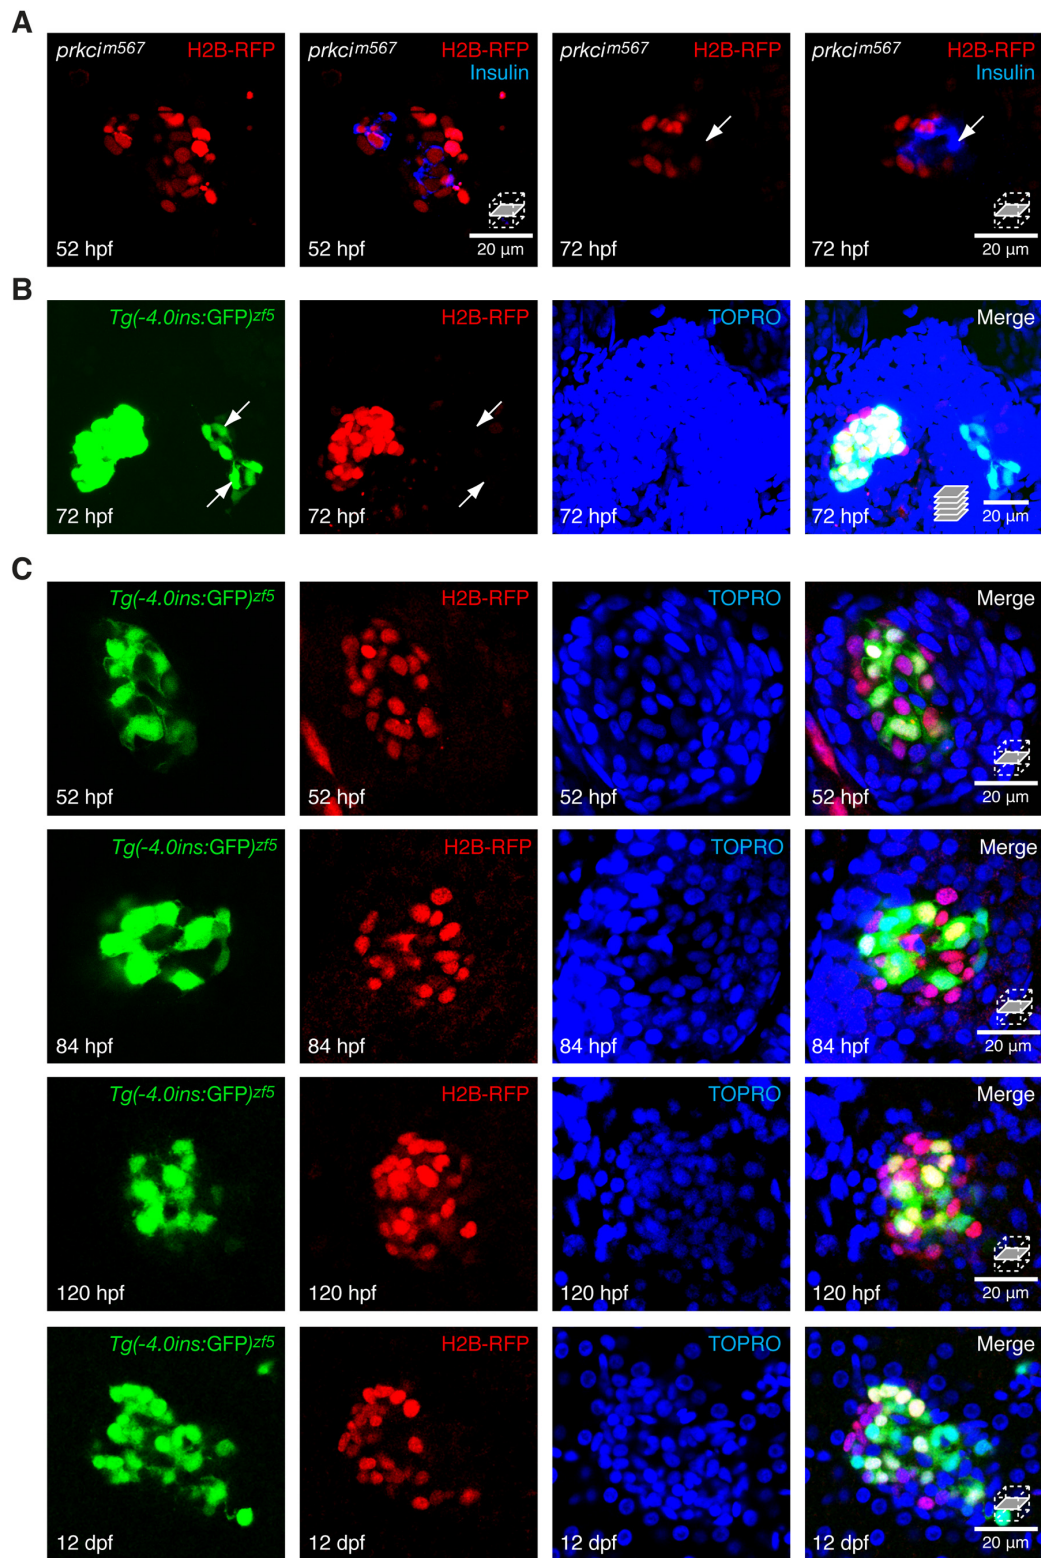

**Fig. S1.** H2B-RFP is retained in dorsal bud derived  $\beta$ -cells during embryonic and larval development. All embryos were injected with H2B-RFP mRNA at the one cell stage. (A) Confocal sections of *prkcim567* mutants, at 52 and 72 hpf, stained with insulin. (B) Confocal projection of an islet stained with TOPRO. (C) Confocal sections of islets that express *Tg(-4.0ins:GFP)zf5* at different developmental time-points stained with TOPRO. (A) All insulin-expressing cells retain the H2B-RFP label at 52 hpf in *prkcim567* mutants. By 72 hpf, label diluted VBCs appear (arrow). (B) *Tg(-4.0ins:GFP)zf5*-positive cells (arrows) that differentiate outside the principal islet do not exhibit the H2B-RFP label. (C) H2B-RFP label-retaining endodermal cells can be clearly distinguished from the surrounding label-diluted cells by 52 hpf. The H2B-RFP label remains easily detectable at 12 dpf.



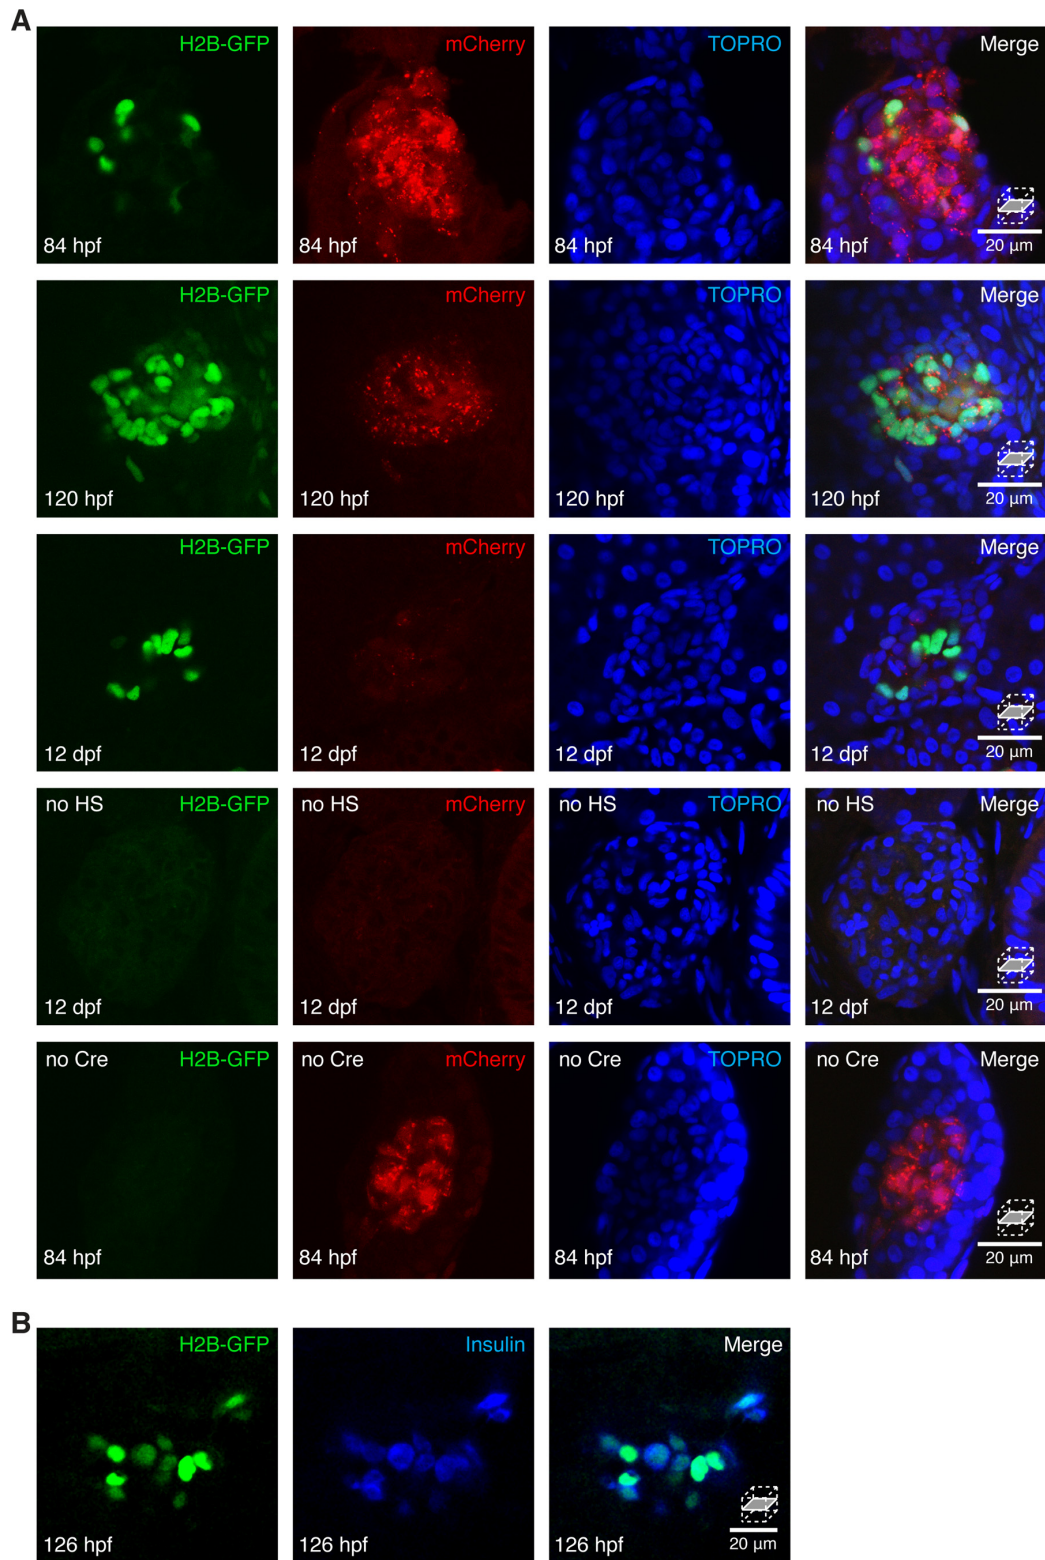

**Fig. 52.** HOTcre controls. (A and B) Confocal sections of islets stained with TOPRO (A) to mark nuclei. (A) The mCherry induction reporter was induced ubiquitously and H2B-GFP was expressed specifically in  $\beta$ -cells by heat-shock of Insulin-HOTcre embryos at 24 hpf. By 84 hpf, mCherry is expressed at low levels in many tissues. Within the slowly dividing endocrine compartment, mCherry is initially retained as bright puncta. The intensity of the mCherry signal is reduced by 120 hpf and reaches the limit of detection by 12 dpf. Without heat-shock treatment, H2B-GFP is not detected in the islet. In the absence of *Tg(ins:Cre; cryaa:Venus)<sup>s24</sup>*, H2B-GFP is not detected in the islet following heat-shock treatment at 24 hpf. (B) H2B-GFP was expressed specifically in  $\beta$ -cells by heat-shock of Insulin-HOTcre embryos at 120 hpf. By 126 hpf, H2B-GFP is expressed in all Insulin positive cells.

**Table S1. Islet quantification**

| Sample    |                       |                      | <i>n</i> |
|-----------|-----------------------|----------------------|----------|
| Figure 2F | GFP(+) dsRed(-)       | GFP(+) dsRed(+)      |          |
| 24 hpf    | 21.0 ± 1.3            | 0                    | 10       |
| 28 hpf    | 27.1 ± 1.6            | 0                    | 8        |
| 34 hpf    | 26.3 ± 1.7            | 0                    | 8        |
| 40 hpf    | 31.1 ± 0.9            | 20.1 ± 1.6           | 7        |
| 46 hpf    | 33.6 ± 1.3            | 25.8 ± 1.0           | 10       |
| Figure 2H | GFP(+) H2B-RFP(+)     | Total GFP(+)         |          |
| 52 hpf    | 22.0 ± 0.6            | 31.8 ± 1.0           | 12       |
| 84 hpf    | 21.7 ± 1.9            | 34.5 ± 1.0           | 11       |
| 120 hpf   | 21.0 ± 1.0            | 35.6 ± 1.2           | 9        |
| 12 dpf    | 22.4 ± 1.7            | 61.6 ± 3.3           | 10       |
| Figure 3D | H2B-GFP(+)            |                      |          |
| 30 hpf    | 21.0 ± 1.1            |                      | 9        |
| 84 hpf    | 19.5 ± 1.3            |                      | 6        |
| 120 hpf   | 21.7 ± 1.6            |                      | 6        |
| 12 dpf    | 22.7 ± 1.2            |                      | 7        |
| Figure 4B | H2B-GFP(+) H2B-RFP(+) | H2B-GFP(+)H2B-RFP(-) |          |
| 126 hpf   | 21.5 ± 1.2            | 11.0 ± 3.2           | 10       |
| 12 dpf    | 22.2 ± 1.8            | 19.4 ± 1.9           | 10       |
| Figure 4D | GFP(+)CFP(+)          | GFP(-)CFP(+)         |          |
| 126 hpf   | 32.8 ± 1.1            | 0                    | 10       |
| 12 dpf    | 41.9 ± 1.3            | 20.1 ± 0.9           | 10       |



**Table S3. Raw Ct values for real-time RT-PCR experiments**

| Gene                            | Ct value (DBC at 12 dpf) $\pm$ SEM | Ct value (VBC at 12 dpf) $\pm$ SEM |
|---------------------------------|------------------------------------|------------------------------------|
| <i><math>\beta</math>-actin</i> | 24.1 $\pm$ 0.1                     | 24.1 $\pm$ 0.1                     |
| <i>insulin</i>                  | 31.1 $\pm$ 0.1                     | 24.7 $\pm$ 0.1                     |
| <i>pdx1</i>                     | 34.4 $\pm$ 0.4                     | 31.5 $\pm$ 0.1                     |
| <i>neuroD</i>                   | 37.6 $\pm$ 0.4                     | 36.2 $\pm$ 0.2                     |
| <i>maf1</i>                     | 33.3 $\pm$ 0.2                     | 32.9 $\pm$ 0.2                     |
| <i>pax6b</i>                    | 36.1 $\pm$ 0.2                     | 33.5 $\pm$ 0.2                     |
| <i>nkx2.2a</i>                  | 35.2 $\pm$ 0.1                     | 34.1 $\pm$ 0.3                     |
| <i>mafba</i>                    | 31.9 $\pm$ 0.1                     | 34.5 $\pm$ 0.2                     |
| <i>mafbb</i>                    | 31.0 $\pm$ 0.1                     | 33.5 $\pm$ 0.4                     |
| <i>cdkn1a</i>                   | 31.0 $\pm$ 0.1                     | 31.7 $\pm$ 0.2                     |
| <i>cdkn1b</i>                   | 30.8 $\pm$ 0.1                     | 31.5 $\pm$ 0.2                     |
| <i>cdkn1bl</i>                  | 33.4 $\pm$ 0.4                     | 34.3 $\pm$ 0.3                     |
| <i>cdkn1c</i>                   | 33.8 $\pm$ 0.1                     | 35.7 $\pm$ 0.5                     |
| <i>cdkn3</i>                    | DNA                                | DNA                                |
| <i>ptf1a</i>                    | DNA                                | DNA                                |

DNA = Did not amplify.
